# Supplementary material
Source: PubMed Central journal article supplement (PMC1459227)
Supplement: pbio.0040127.sg003.pdf [file pbio.0040127.sg003.pdf]

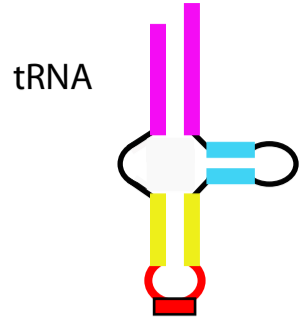

|                                  | Acceptor steam                       | Anticodon-stem  | Anticodon | T-stem                                  | AGG |
|----------------------------------|--------------------------------------|-----------------|-----------|-----------------------------------------|-----|
| <i>A. aceris</i> /5-98           | -----AACTCTT--TATTTAA-----ATATAAC    | TTCTAA          | TTATAT    | ---TAAAGTAT--AAA--TACTAAGAGTTT-----     | S   |
| <i>A. albopictus</i> /5-98       | -----GAAATATGT--TGATCAA-----GAAAAA   | GCTGCTAA        | CTTTTTC   | ---TTTAAAGTGTAAATTCATTTATATTTCT-----    | ?   |
| <i>A. americanus</i> /5-98       | -----AGGAAATGT--TATTTAA-----AATTAAG  | CTTCTAA         | CTTAAAT   | ---TTTAGCAGTGAATTCGTACTTTCCCTA-----     | S   |
| <i>A. armillatus</i> /5-98       | -----AGGA--ATACATT-----AAGGGAC       | TTCTAA          | TCCCA     | ---ACAAAGTGACAATCATATATTTCCCTC-----     | S   |
| <i>A. franciscana</i> /5-98      | -----AGGCAGAA--AGAAGGA-----TGAGAG    | GCTGCTAA        | CTTCAA    | ---CCGGTAGTTAAATCTA-CTCACTGTTCT-C-----  | ?   |
| <i>A. gambiae</i> /1-98          | -----GAAATATGT--TGATCAA-----GAAAAA   | GCTGCTAA        | CTTTCTC   | ---TTTAAAGTGTAAATTCATTTATATTTCT-----    | -   |
| <i>A. mellifera</i> /5-98        | -----GAAATA--TTAATA-----ATAAAG       | CTTCTAA         | CTTAAAC   | ---TCTAGAT-TCAATAAATACTATAATTTCTT-----  | S   |
| <i>A. pernyi</i> /5-98           | -----GAAATATA--AGTTTAA-----AATTAAG   | CTGCTAA         | CTTAAAT   | ---TTTAGTGGTTAAATTCATTAATATTTCT-----    | ?   |
| <i>A. quadrimaculatus</i> /1-98  | -----GAAATATGT--TGATCAA-----GAAAAA   | GCTGCTAA        | CTTTATC   | ---TTTAAAGTGTAAATTCATTTATATTTCT-----    | -   |
| <i>A. triguttatum</i> /5-98      | -----GATTA--ATTTTGT-----TTTAGGC      | TTCTAA          | CTGAA     | ---AATAGGAATTTCCATTTAATCTT-----         | S   |
| <i>B. mandarina</i> /1-98        | -----GAAATATA--TGAATTA-AT---ATTAAG   | CTGCTAA         | CTTAAAT   | ---TTTAGTGGTTAAATTCATTAATATTTCT-----    | -   |
| <i>B. mori</i> /5-98             | -----GAAATA--TGAATTA-AT---ATTAAG     | CTGCTAA         | CTTAAAT   | ---TTTAGTGGTTAAATTCATTAATATTTCT-----    | K   |
| <i>B. oleae</i> /5-98            | -----GAAGTATGA--GGTTCAA-----GAAAAA   | GCCGCTAA        | CTTTATC   | ---TTTAAAGTGTAAACTCCATTTATACTTCT-----   | ?   |
| <i>B. tabaci</i> /5-98           | -----AAACCTTC--TGA-----AATAAG        | CTTCTAA         | CTATAT    | ---TATAGTAGATAATTTACTAAGGTTT-----       | S   |
| <i>C. capensis</i> /5-98         | -----AAGGCTA--TAAC-----TTAGAG        | CTGCTAA         | CTCTAT    | ---AAATAAGTAATTCATTTAGCCTTT-----        | K   |
| <i>C. capitata</i> /1-98         | -----GAAGTATGA--CGTTCAA-----GAAAAA   | GCTGCTAA        | CTTTATC   | ---TTTAAAGTGTAAACTCCATTTATACTTCT-----   | -   |
| <i>C. destructor</i> /5-98       | -----GAGAAAA--TGCCAAAG-----AAAAAG    | CTTCTAA         | CTTTATC   | ---CTGAGCGGTTAAATTCGTCTCTCTCT-----      | S   |
| <i>C. duodecimpunctata</i> /5-98 | -----GAAATATAC--GTATGA-AA---ATAAG    | CTTCTAA         | CTTAGTTT  | ---TAAACGATGAATTCGTCTCTCTCTCT-----      | S   |
| <i>C. hominivorax</i> /5-98      | -----AGAAATGA--TGTTCAA-----GTAAAA    | GCTGCTAA        | CTTTCTC   | ---TTTAAAGTGTAAATTCATTTATACTTCTA-----   | K   |
| <i>C. limpidus</i> /5-98         | AACCCGTGTTATGAGG--AGGGCTG-----TTGGGC | TGCTAA          | CTGACT    | ---TATAGC---AAGGGTGTAAAC-----           | K   |
| <i>C. putoria</i> /1-98          | -----AGAAATGA--TGTTCAA-----GTAAAA    | GCTGCTAA        | CTTTCTC   | ---TTTAAAGTGTAAATTCATTTATACTTCTA-----   | -   |
| <i>C. sapidus</i> /5-98          | -----GAAATATTA--TGACAAA-----ATAAGA   | GCTTCTAA        | CTTTTTC   | ---TTTAAAGCGGTTGAATTCGTTTATATTTCT-----  | S   |
| <i>D. hominis</i> /5-98          | -----AGAAATGA--TGTTCAA-----GTAAAA    | GCTGCTAA        | CTTTCTC   | ---TTTAAAGTGTAAATTCATTTATACTTCTA-----   | K   |
| <i>D. mauritiana</i> /1-98       | -----GGAAATGA--TGATCAA-----GTAAAA    | GCTGCTAA        | CTTTCTC   | ---TTTAAAGTGTAAATTCATTTATACTTCTA-----   | -   |
| <i>D. melanogaster</i> /1-98     | -----GAAATGA--TGATCAA-----GTAAAA     | GCTGCTAA        | CTTTCTC   | ---TTTAAAGTGTAAATTCATTTATATTTCT-----    | -   |
| <i>D. pulex</i> /5-98            | -----GAAGTAA--AGTAAG-----GAAGA       | GCTGCTAA        | CTGTCT    | ---CTAAGCGGTTGAATTCGTTTGTATTTCT-----    | ?   |
| <i>D. sechellia</i> /1-98        | -----GGAAATGA--TGATCAA-----GTAAAA    | GCTGCTAA        | CTTTCTC   | ---TTTAAAGTGTAAATTCATTTATACTTCTA-----   | -   |
| <i>D. simulans</i> /1-98         | -----GGAAATGA--TGATCAA-----GTAAAA    | GCTGCTAA        | CTTTCTC   | ---TTTAAAGTGTAAATTCATTTATACTTCTA-----   | -   |
| <i>D. yakuba</i> /1-98           | -----GAAGTATGA--TGATCAA-----GTAAAA   | GCTGCTAA        | CTTTCTC   | ---TTTAAAGTGTAAATTCATTTATACTTCTA-----   | -   |
| <i>G. hodgsoni</i> /5-98         | -----TGAAAGAAGT--AGATCAT---ATTTAA    | GCTGCTAA        | CTTAAAT   | ---TTTAAAGCGGTTAAACTCCGTTATTTCTCTA----- | ?   |
| <i>G. orientalis</i> /5-98       | -----GAAATGTGA--TGTTCAA-----TTAGAA   | GCTGCTAA        | CTTAAAT   | ---TTTAAAGCGGTTAAACTCCGTTATTTCTCTA----- | K   |
| <i>H. coagulata</i> /5-98        | -----AAGAGGTTAAGTTAAA-----GAAATA     | GCTGCTAA        | CTTAAAT   | ---TTTAAAGCGGTTAAACTCCGTTATTTCTCTA----- | -   |
| <i>H. flava</i> /5-98            | -----AAGATTA--ATAC-----TTTAGC        | TTCTAA          | CTTAAAT   | ---TTTAAAGCGGTTAAACTCCGTTATTTCTCTA----- | S   |
| <i>H. hangzhouensis</i> /5-98    | -----AAGG--AAATCAA-----TTTAGC        | TGCTAA          | CTTAAAT   | ---TTTAAAGCGGTTAAACTCCGTTATTTCTCTA----- | K   |
| <i>H. harpari</i> /5-98          | -----GAAATAAAC--TGAAGT-----AGAAAA    | GCTACTAA        | CTTAAAT   | ---TTTAAAGCGGTTAAACTCCGTTATTTCTCTA----- | S   |
| <i>H. macracantha</i> /5-98      | -----GGAAATAGATTGTTTATAGA---TTTGA    | GCTACTAA        | CTTAAAT   | ---TTTAAAGCGGTTAAACTCCGTTATTTCTCTA----- | S   |
| <i>H. macropus</i> /5-98         | -----AGTAACGTAGTATACCAAG-----TTTGA   | GCTTCTAA        | CTTAAAT   | ---TTTAAAGCGGTTAAACTCCGTTATTTCTCTA----- | S   |
| <i>H. oregonensis</i> /5-98      | -----GAATAGTC--AGATAGG-----G-AA      | GCTGCTAA        | CTTCT     | ---TATAGCGAGTAGCTACTAAGAG-----          | K   |
| <i>I. hexagonus</i> /5-98        | -----AAGAT--TAACCTT-----ATAGAC       | TTCTAA          | CTTCT     | ---TATTAAGTAATTCATTTAACTTT-----         | S   |
| <i>I. holocyclus</i> /5-98       | -----AAGAT--TAATTA-----ATTAGC        | TTCTAA          | CTTCT     | ---TAAATAAGTAATAATTCATTTAACTTT-----     | ?   |
| <i>I. persulcatus</i> /5-98      | -----AAGA--TTAECTT-----TATAGC        | TTCTAA          | CTTCT     | ---TAAATAAGTAATTCATTTAACTTT-----        | S   |
| <i>I. uriae</i> /5-98            | -----AAGAT--TAAACAA-----TTTAGC       | TTCTAA          | CTTCT     | ---TAAATAAGTAATTCATTTAACTTT-----        | S   |
| <i>L. forficatus</i> /5-98       | -----AGATAAT--CGCGC-----ATGAG        | CCTTAA          | CTTCT     | ---TAAATAAGTAATTCATTTAACTTT-----        | K   |
| <i>L. migratoria</i> /5-98       | -----GAAATGTAA--AGCCAAT-----ATAAAA   | GCTGCTAA        | CTTTCT    | ---TAAATAAGTAATTCATTTAACTTT-----        | K   |
| <i>L. polyphemus</i> /5-98       | -----GAAATACGA--ATGAACATA-----GAAGA  | GCTGCTAA        | CTTTCT    | ---TAAATAAGTAATTCATTTAACTTT-----        | ?   |
| <i>M. gibbosus</i> /5-98         | -----TAAAAGA--GGAAAAG-----ACACGC     | TGCTAA          | CTTCT     | ---TAAATAAGTAATTCATTTAACTTT-----        | K   |
| <i>M. rosenbergii</i> /5-98      | -----GGAAAACAA--GGAGGAG-----AGGAA    | GCTTCTAA        | CTTCT     | ---TAAATAAGTAATTCATTTAACTTT-----        | S   |
| <i>M. volcano</i> /5-98          | -----AAAATGA--ATCCCCT-----TGAA       | GCTGCTAA        | CTTCT     | ---TAAATAAGTAATTCATTTAACTTT-----        | ?   |
| <i>N. andropogonis</i> /5-98     | -----AAGCTTA--ATA-----AAAGT          | ACTTCTAA        | CTTCT     | ---TAAATAAGTAATTCATTTAACTTT-----        | S   |
| <i>N. annularis</i> /5-98        | -----GATT--AGCCTAA-----TTTAA         | GCCGCTAA        | CTTCT     | ---TAAATAAGTAATTCATTTAACTTT-----        | K   |
| <i>O. furnacalis</i> /5-98       | -----AGAAATAA--AGTATA-----AATTA      | GCTGCTAA        | CTTCT     | ---TAAATAAGTAATTCATTTAACTTT-----        | K   |
| <i>O. huwena</i> /5-98           | TGTTCA TAGAAGGGA--AGTAAAG-----TAT    | GGGCTGCTAA      | CTTCT     | ---TAAATAAGTAATTCATTTAACTTT-----        | K   |
| <i>O. moubata</i> /5-98          | -----AAAGCTAA--AAA-----CCAGGC        | TGCTAA          | CTTCT     | ---TAAATAAGTAATTCATTTAACTTT-----        | K   |
| <i>O. nubilalis</i> /1-98        | -----AGAAATAA--AGTATA-----AATTA      | GCTGCTAA        | CTTCT     | ---TAAATAAGTAATTCATTTAACTTT-----        | K   |
| <i>O. orientalis</i> /1-98       | -----AAAAGAA--TTAECTT-----TTGA       | GCTGCTAA        | CTTCT     | ---TAAATAAGTAATTCATTTAACTTT-----        | -   |
| <i>O. porcinus</i> /5-98         | -----AAGGTTA--AA-----ACCAGC          | TGCTAA          | CTTCT     | ---TAAATAAGTAATTCATTTAACTTT-----        | K   |
| <i>P. aquatica</i> /5-98         | -----AAGAAAAGGAGGGTTAAT-----AA       | TAAAGCCGCTAA    | CTTCT     | ---TAAATAAGTAATTCATTTAACTTT-----        | K   |
| <i>P. fuliginosa</i> /5-98       | -----GAAATGTGT--AGAACAA-----GTAAA    | GCTGCTAA        | CTTCT     | ---TAAATAAGTAATTCATTTAACTTT-----        | ?   |
| <i>P. gigas</i> /5-98            | -----GGAAATTTT--ATAC-----AAAA        | GCTTCTAA        | CTTCT     | ---TAAATAAGTAATTCATTTAACTTT-----        | S   |
| <i>P. japonicus</i> /5-98        | -----GAAATATTTGTTGAAATGA-----AA      | AAGACTTCTAA     | CTTCT     | ---TAAATAAGTAATTCATTTAACTTT-----        | S   |
| <i>P. longicarpus</i> /5-98      | -AAGCAAGAGATCTT--TGCCAAA-----GAG     | AAAGCTTCTAA     | CTTCT     | ---TAAATAAGTAATTCATTTAACTTT-----        | S   |
| <i>P. monodon</i> /1-98          | -----GGAATAGGT--AGATCAA-----GAAA     | AAGCTGCTAA      | CTTCT     | ---TAAATAAGTAATTCATTTAACTTT-----        | -   |
| <i>P. polymerus</i> /5-98        | -----GAAATGAA--AATT-----TTAG         | AGCTGCTAA       | CTTCT     | ---TAAATAAGTAATTCATTTAACTTT-----        | S   |
| <i>P. princeps</i> /1-98         | -----GAAATGA--TGTTCAA-----GAAA       | AAGCTGCTAA      | CTTCT     | ---TAAATAAGTAATTCATTTAACTTT-----        | S   |
| <i>P. rufa</i> /5-98             | -----GAAATA--TATTCAA-----AATGA       | AGCTTCTAA       | CTTCT     | ---TAAATAAGTAATTCATTTAACTTT-----        | S   |
| <i>P. spumarius</i> /5-98        | -----AGAAAATA--GATAAT-----AAAG       | TAGCTGCTAA      | CTTCT     | ---TAAATAAGTAATTCATTTAACTTT-----        | K   |
| <i>P. trituberculatus</i> /5-98  | -----GGAATATTA--CGTCAA-----AAAG      | AAAGCTTCTAA     | CTTCT     | ---TAAATAAGTAATTCATTTAACTTT-----        | ?   |
| <i>P. venusta</i> /5-98          | -----GG--AGTCTTG-----AAG             | AGCTGCTAA       | CTTCT     | ---TAAATAAGTAATTCATTTAACTTT-----        | S   |
| <i>R. sanguineus</i> /5-98       | -----AAGAT--TAATCA-----TTTAG         | CTTCTAA         | CTTCT     | ---TAAATAAGTAATTCATTTAACTTT-----        | S   |
| <i>S. coleoprata</i> /5-98       | -----AGAAATAA--AAT-----TTAA          | AGCTGCTAA       | CTTCT     | ---TAAATAAGTAATTCATTTAACTTT-----        | S   |
| <i>S. mantis</i> /5-98           | -----GAAATAAAC--TGATGT-----AGAAA     | AGCTACTAA       | CTTCT     | ---TAAATAAGTAATTCATTTAACTTT-----        | S   |
| <i>S. tulumensis</i> /5-98       | -----GGAAGTAGA--TAAA-----CTTAG       | CGCTAA          | CTTCT     | ---TAAATAAGTAATTCATTTAACTTT-----        | K   |
| <i>T. bielaniensis</i> /5-98     | ----TGA TAAAGAA TAAGTTATT-----TT     | TAAAGCTGCTAA    | CTTCT     | ---TAAATAAGTAATTCATTTAACTTT-----        | K   |
| <i>T. cancriformis</i> /5-98     | -----AGGATAA--AGAAAA-----GAAG        | AGCTGCTAA       | CTTCT     | ---TAAATAAGTAATTCATTTAACTTT-----        | K   |
| <i>T. castaneum</i> /5-98        | -----GAAAATA--TACAAAA-----AATA       | AGCTTCTAA       | CTTCT     | ---TAAATAAGTAATTCATTTAACTTT-----        | S   |
| <i>T. dimidiata</i> /5-98        | ----AAGGAATGA--AGATCCT-AA---AAG      | AAGCTGCTAA      | CTTCT     | ---TAAATAAGTAATTCATTTAACTTT-----        | K   |
| <i>T. domestica</i> /5-98        | --GAGATGTGAAAT--AATCAAG-----AAG      | AGCTGCTAA       | CTTCT     | ---TAAATAAGTAATTCATTTAACTTT-----        | ?   |
| <i>T. gertschi</i> /5-98         | CTAAGAGGATTTGAG--TGTTCAA-----GA      | TGAAAGCTGCTAA   | CTTCT     | ---TAAATAAGTAATTCATTTAACTTT-----        | K   |
| <i>T. imaginis</i> /5-98         | -----AGATAA--TAAT-----TTAA           | AGCTTCTAA       | CTTCT     | ---TAAATAAGTAATTCATTTAACTTT-----        | S   |
| <i>T. japonica</i> /1-98         | -----GAAAATG--TAACCTC-----TCA        | TAGCTGCTAA      | CTTCT     | ---TAAATAAGTAATTCATTTAACTTT-----        | -   |
| <i>T. japonica</i> /5-98         | TTTTTAAACCGTGGTTAAGAGGTG-TAAA--      | GTTTAAAGCTTCTAA | CTTCT     | ---TAAATAAGTAATTCATTTAACTTT-----        | S   |
| <i>T. longicaudatus</i> /5-98    | -----AGGATAGA--AGAAAA-----GAAG       | AGCTGCTAA       | CTTCT     | ---TAAATAAGTAATTCATTTAACTTT-----        | ?   |
| <i>T. sp.</i> /5-98              | -----GAGCTATA--ATTT-----ATTA         | AGCCGCTAA       | CTTCT     | ---TAAATAAGTAATTCATTTAACTTT-----        | K   |
| <i>T. vaporariorum</i> /5-98     | -----AAACTTAT--TTT-----CGTA          | GCTTCTAA        | CTTCT     | ---TAAATAAGTAATTCATTTAACTTT-----        | S   |
| <i>V. destructor</i> /5-98       | -----AAGAT--TAAATA-----TAA           | AGCTGCTAA       | CTTCT     | ---TAAATAAGTAATTCATTTAACTTT-----        | ?   |
| <i>V. hilgendorffii</i> /5-98    | -----GAAACAAGA--CACCCAT-----TTC      | AGGATTTCTAA     | CTTCT     | ---TAAATAAGTAATTCATTTAACTTT-----        | S   |
| <i>I.RS-2001/1-98</i>            | -----GAAATAAGA TTTGATCAA-----A       | TAGCTGCTAA      | CTTCT     | ---TAAATAAGTAATTCATTTAACTTT-----        | -   |

Consensus

T+++CAGAAATATGATATGATCAA-AA--AGAAAAAGCTGCTAACTTTATTTCTTTTAGCGGTTAAATTCGGTTTATATTTCTT-----
